# Supplementary material for: A child chronic cough-specific quality of life measure: development and validation
Source: HighWire-hosted journal article supplement (doi:10.1136/thoraxjnl-2015-207473), 2016-02-03
Supplement: thoraxjnl-2015-207473supp.pdf [file thoraxjnl-2015-207473supp.pdf]

# **Development of a Child Chronic Cough Quality of Life questionnaire (CC-QOL):**

## **Development and validation**

Peter A Newcombe, Jeanie Sheffield, Helen Petsky, Julie Marchant,

Carol Willis, and Anne Chang.

## **SUPPLEMENTARY FILE**

Two methods were adopted for MID calculations. The first, distribution method, was based on criteria that link important differences to a statistical parameter, most notably effect size (ES),<sup>1</sup> standard error of measurement (SEM)<sup>2</sup> and standard deviation (SD)<sup>3</sup> of the QoL. The effect size reflects a standardized measure of change and is found by dividing the pre- to post-test outcome absolute difference scores by the SD at pre-test. The SEM is not sample dependent and is calculated as the standard deviation of a measure multiplied by the square root of one minus its reliability coefficient. A one-SEM criterion is commonly seen as representing a minimally important difference in QoL scores.<sup>2</sup> A final distribution method that considers a one-half a standard deviation as a minimally important difference<sup>3</sup> was also adopted for the absolute QoL change scores.

A second method in calculating MID scores involved an anchor-based approach<sup>4</sup> where changes in QoL were examined against changes in an external but meaningful anchor, cough severity using VCD. A positive QoL change score (i.e., higher scores at Time-2 than at Time-1) represented an improved QoL. The anchor change scores were derived from the differences in ratings of VCD at the two time points with classification schema based on previous research<sup>4-5</sup> and seen as a change of visible difference. A classification of “unchanged” was indicated by a VCD change score of 0. An absolute VCD change score of 1

denoted a “small” change, equivalent to a minimally important difference (MID). A “moderate” change was represented by absolute VCD change scores of 2 and 3 with a “large” change signified by scores >3. We previously classified using anchor values.<sup>6</sup>

## REFERENCES

1. Wyrwich, K.W., & Wolinsky, F.D., *Identifying meaningful intra-individual change standards for health-related quality of life measures*. Journal of Evaluation in Clinical Practice, 2000. **6** 39-49.
2. Wyrwich, K.W., Tierney, W.M., & Wolinsky, F.D., *Further evidence supporting an SEM-based criterion for identifying meaningful intra-individual changes in health-related quality of life*. Journal of Clinical Epidemiology, 1999. **52** 861-873.
3. Norman, G.R., Sloan, J.A., & Wyrwich, K.W., *Interpretation of changes in health-related quality of life: The remarkable universality of half a standard deviation*. Medical Care, 2003. **41** 582-592.
4. Juniper, E.F., Guyatt, G.H., Willan, A., & Griffith, L.E. 1994, 47:81-87., *Determining a minimally important change in a disease-specific Quality of Life Questionnaire*. Journal of Clinical Epidemiology, 1994. **47** 81-87.
5. Raj, A.A., Pavord, D.I., & Birring, S.S., *Clinical cough IV: What is the minimal important difference for the Leicester Cough Questionnaire?* Handbook of Experimental Pharmacology, 2009. **187** 311-320.
6. Newcombe, P.A., Sheffield, J.K., & Chang, A.B., *Minimally important change in a parent-proxy quality of life questionnaire for pediatric chronic cough*. Chest, 2011. **139** 576-580.
